# Supplementary material
Source: Springer Nature journal article supplement (https://www.springermedizin.de/resource/supplementary/12874_2010_458_MOESM5_ESM.pdf/9432134)
Supplement: MOESM5 [file 9432134]

$\log(\text{LRT})$

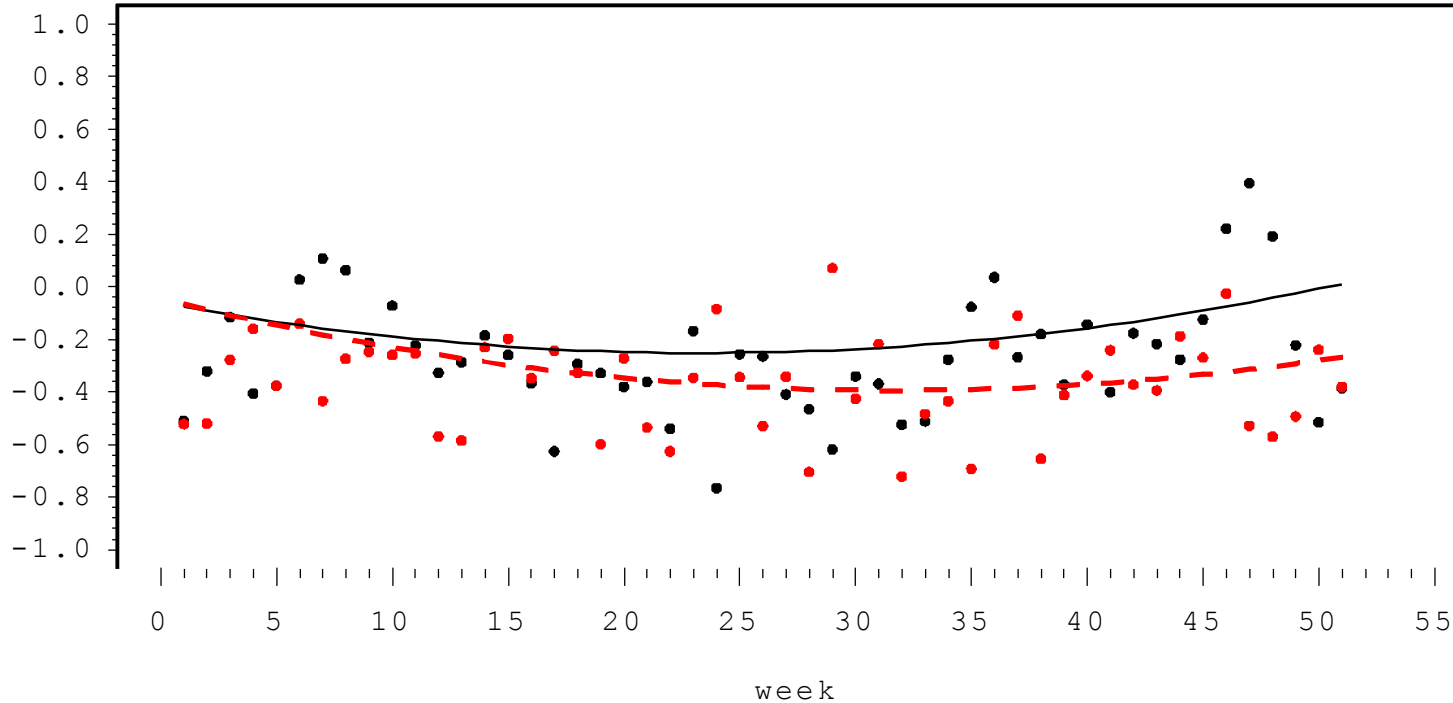

- ● ● mean log(lrt) for age group < 8 yrs
- ● ● mean log(lrt) for age group 8 yrs or older
- predicted log(lrt) for age group < 8 yrs
- - - predicted log(lrt) for age group 8 yrs or older
